# Supplementary material for: Molecular insights of protein contour recognition with ligand pharmacophoric sites through combinatorial library design and MD simulation in validating HTLV-1 PR inhibitors
Source: Royal Society of Chemistry journal article supplement (doi:10.1039/c4mb00486h), 2014-10-08
Supplement: c4mb00486h1.pdf [file c4mb00486h1.pdf]

Molecular insights of protein contours recognition with ligand pharmacophore sites through combinatorial library design and MD simulation in validating HTLV PR inhibitors

Chandrabose Selvaraj<sup>1</sup>, Ankur Omer<sup>2</sup>, Poonam Singh\*<sup>2</sup> and Sanjeev Kumar Singh\*<sup>1</sup>

## Supplementary information

### Ligand Designing on R- Positions

From these contours are consider for requirement of additional elements in the known inhibitor and ligand rearrangement is done with use of Ligand designer script (Schrodinger) and ChemSketch, the ligand rearrangement position R1, R2, R3, R4 are marked by ligand designer script and attachment of atoms to known inhibitor position by ChemSketch, and ligand prepared through Ligprep.

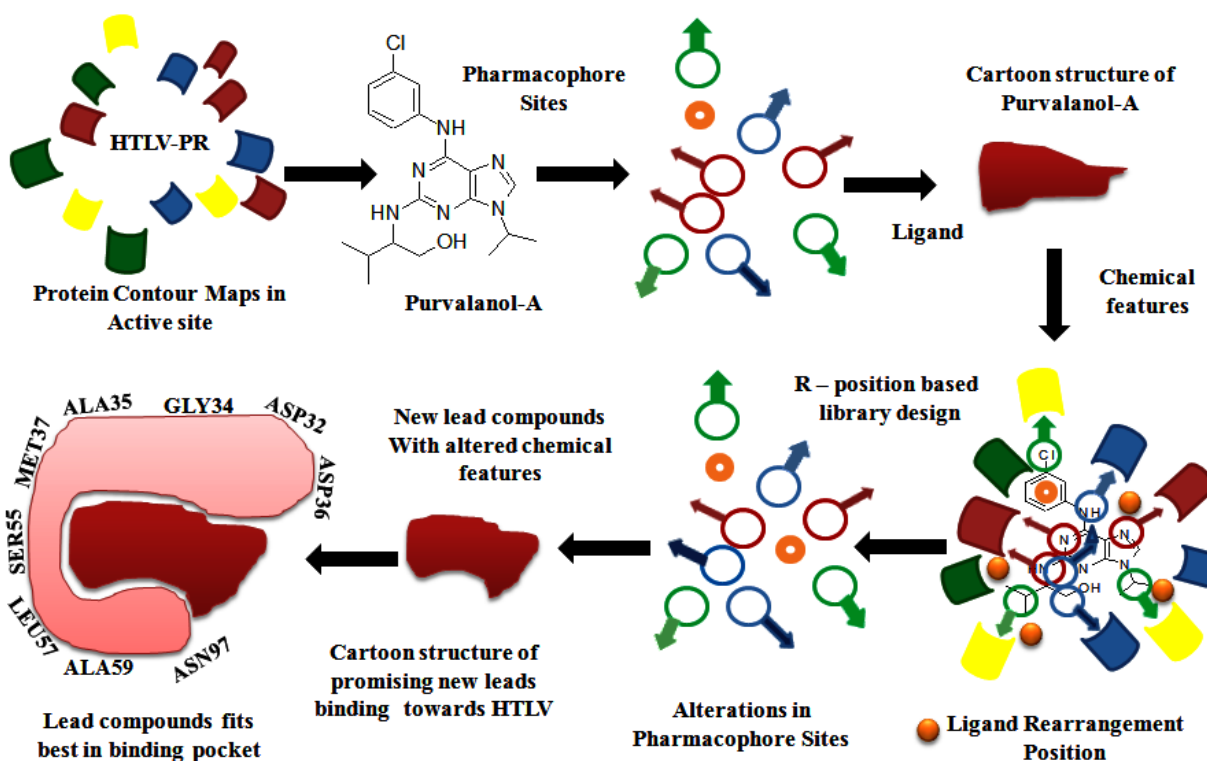

Figure S1. (a), contours are analyzed for ligand rearrangement with pharmacophore rearrangement

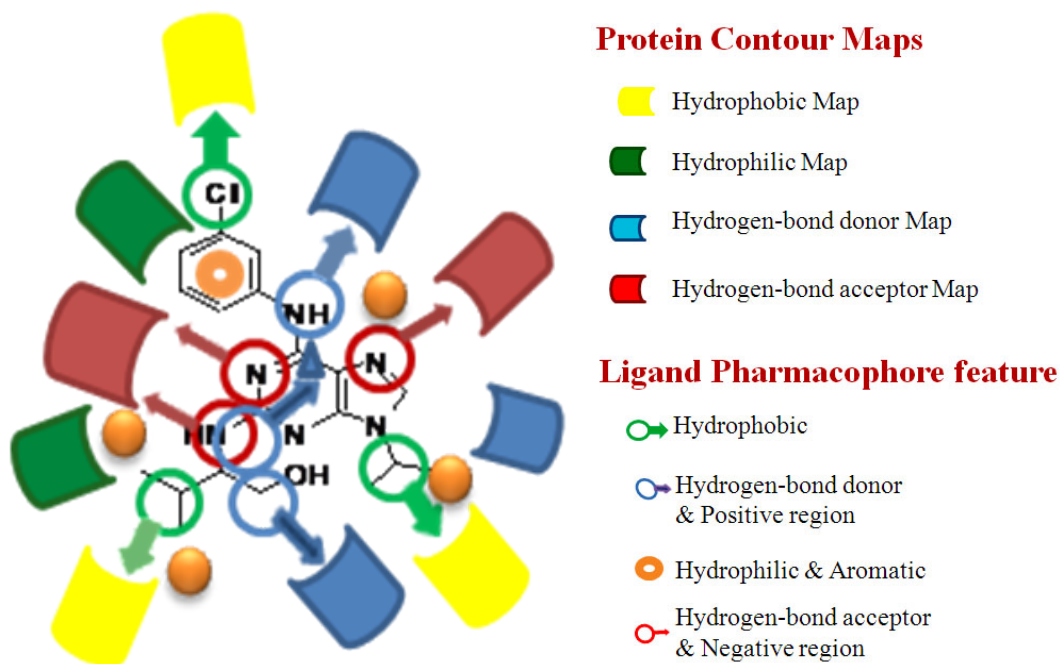

**Figure S1 (b).** Represents the cartoon structure of contours with respective pharmacophore, and region of ligand requirement, and orange color spheres represents the ligand requirement and additional atoms attached at that R position.

## Derivatives of Ligand

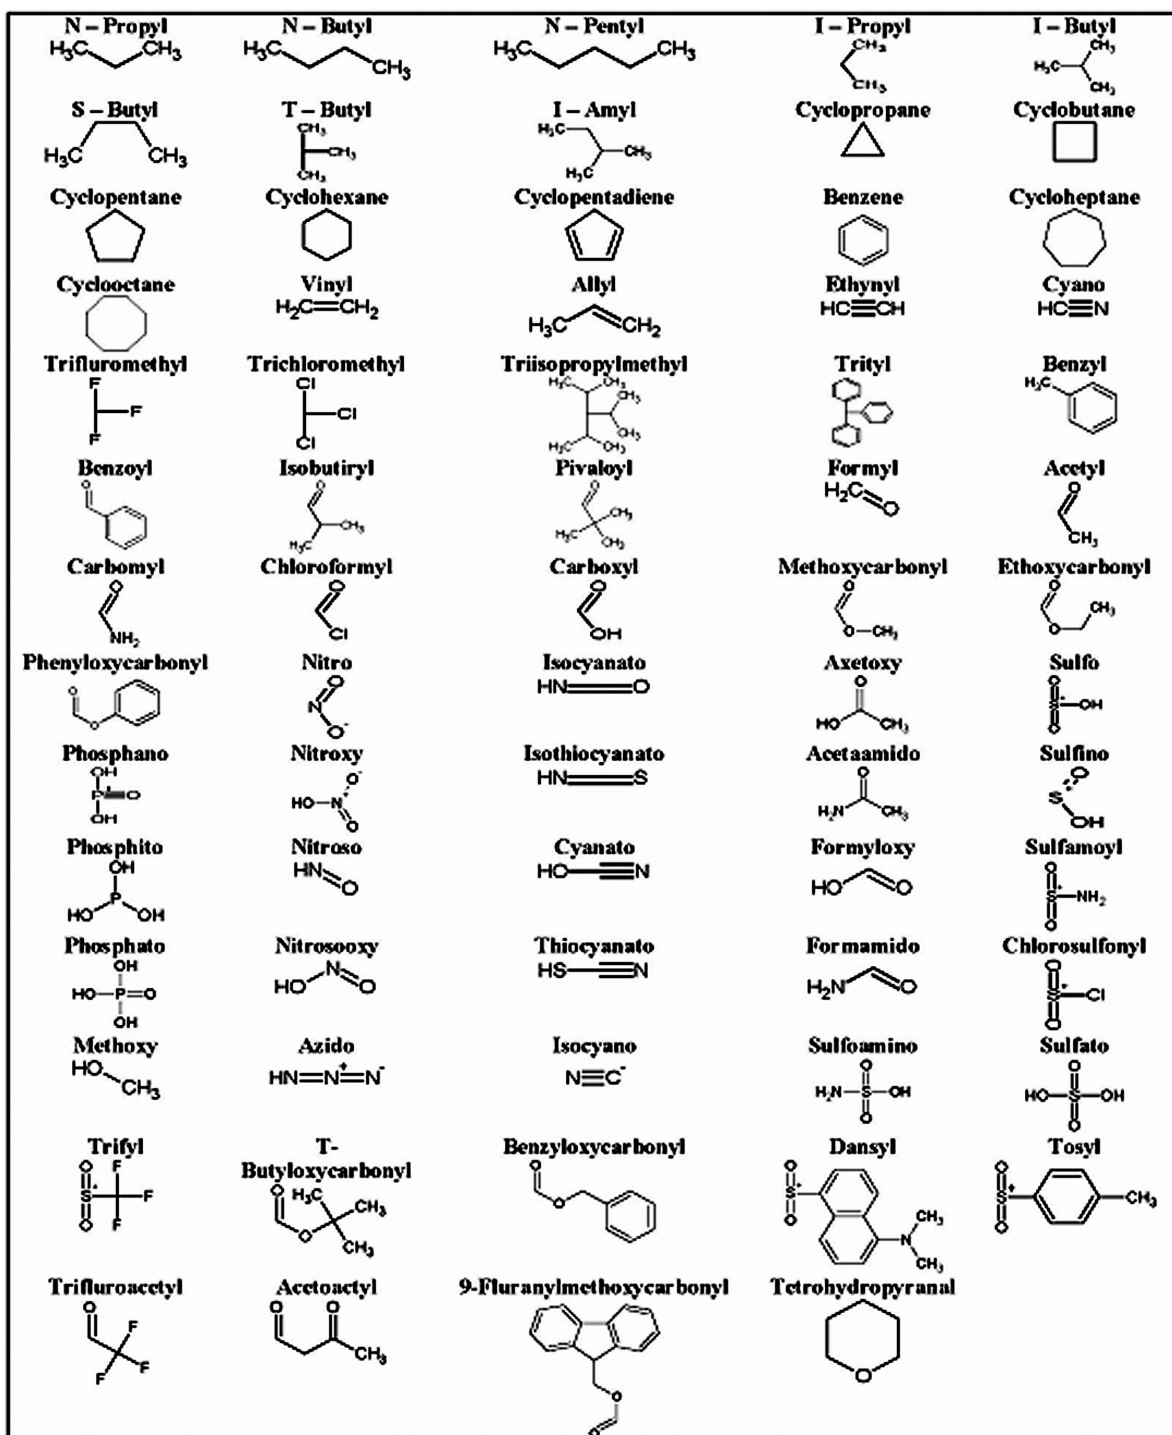

**Figure S2.** The known inhibitor Purvalanol-A are added with the **Chain structure** - N - Propyl, N - Butyl, N - Pentyl, I - Propyl, I - Butyl, S - Butyl, T - Butyl, I - Amyl, **Cycle structure** - Cyclopropane, Cyclobutane, Cyclopentane, Cyclohexane, Cyclopentadiene, Benzene, Cycloheptane, Cyclooctane. **C-groups** - Vinyl, Allyl, Ethynyl, Cyano, Trifluoromethyl,

Trichloromethyl, Triisopropylmethyl, Trityl, Benzyl, Benzoyl, Isobutiryl, Pivaloyl, Formyl, Acetyl, Carbonyl, Chloroformyl, Carboxyl, Methoxycarbonyl, Ethoxycarbonyl, Phenyloxycarbonyl. **Miscellaneous** – Nitro, Isocyanato, Acetoxy, Sulfo, Phosphano, Nitroxy, Isothiocyanato, Acetoamido, Sulfino, Phosphito, Nitroso, Cyanato, Formyloxy, Sulfamoyl, Phosphato, Nitrosooxy, Thiocyanato, Formamido, Chlorosulfonyl, Methoxy, Azido, Isocyano, Sulfoamino, Sulfato, Triflyl. **Protecting groups** - T- Butyloxycarbonyl, Benzyloxycarbonyl, Dansyl, Tosyl, Trifluoroacetyl, Acetoactyl, 9-Fluranylmethoxycarbonyl, Tetrahydropyranal in the  $R^1$ ,  $R^2$ ,  $R^3$ ,  $R^4$  position of each inhibitor, and the new leads are obtained and are subjected to Site based molecular docking.

### Active Site Prediction

Active site prediction of crystal structure of HTLV-PR, binding pocket present in between the two monomer chains, Z-Shaped binding pocket, which shows

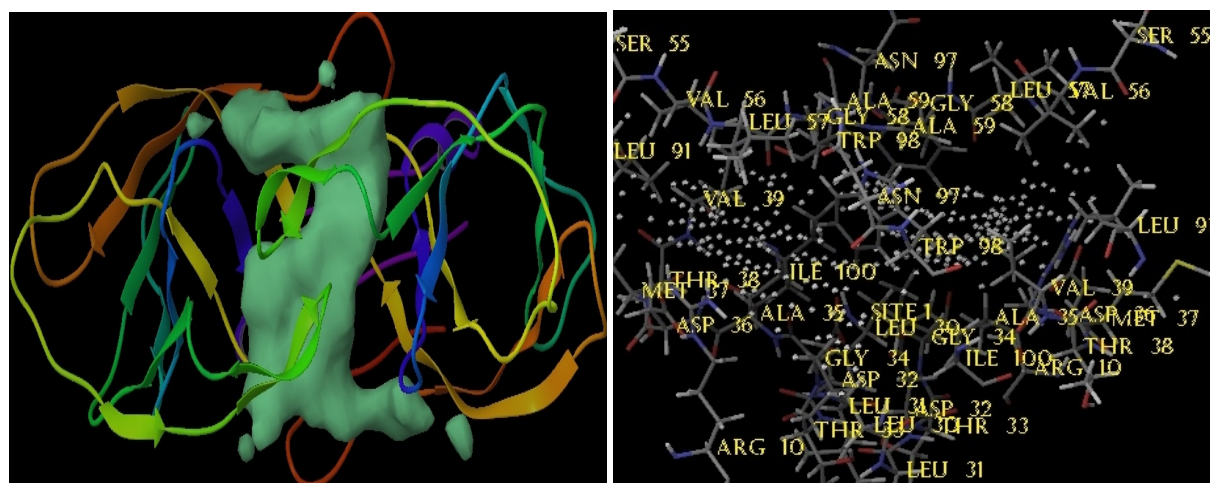

**Figure S3. (a)** Represents the Site1 of the crystal structure of 2B7F, showing Z shaped binding pocket, colored in turquoise, present in between the two monomer chain (A and B chain), indicates both chains are to inhibited, by drug (active site binding pocket, resembles to HIV-PR) **(b)** The white colored dots indicates the Site1, represents the residues nearby the Site1 which having tendency to interact the ligand atoms, through hydrogen bond interaction.

Figure S4

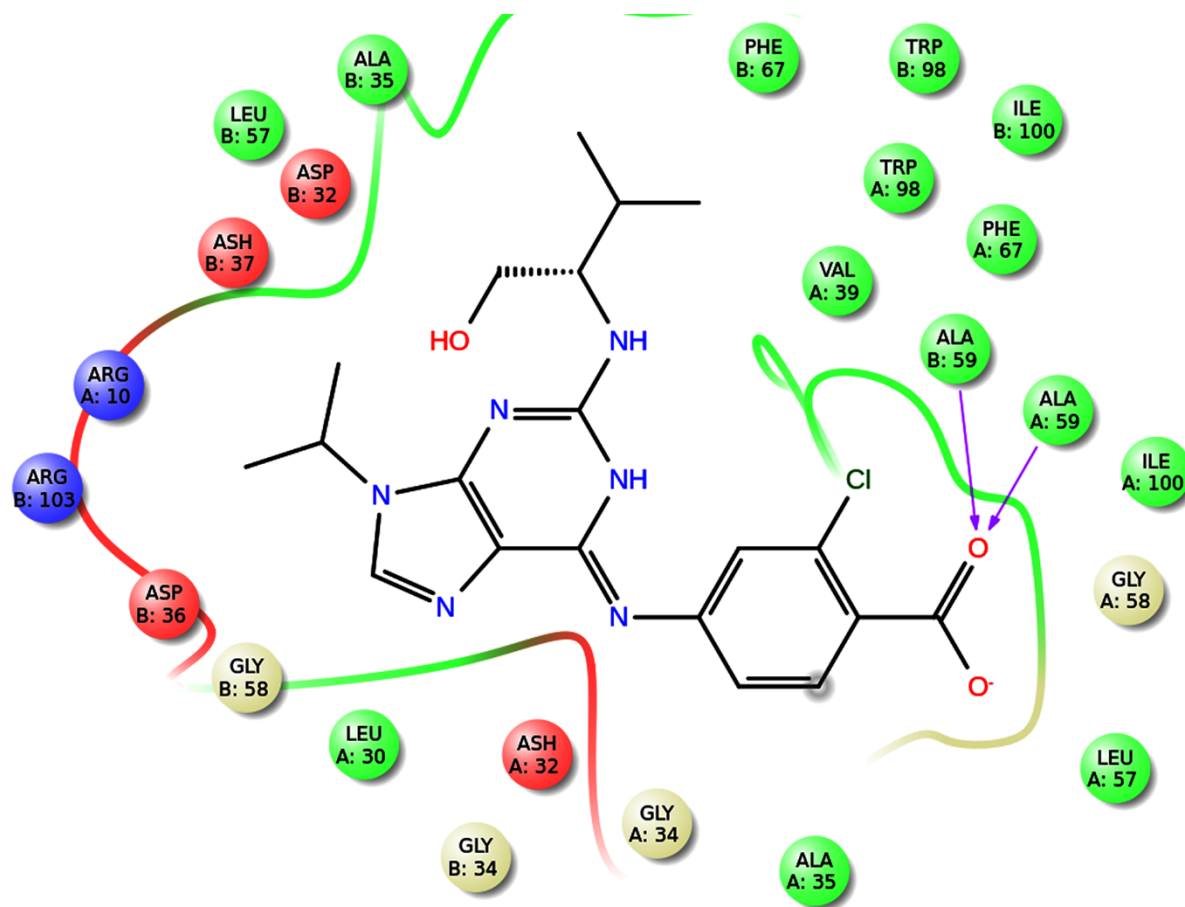

Figure S4: Purvalanol A shows weak interactions with the mutant HTLV-1 PR.

## Molecular docking results in site based ligand docking

Site obtained from sitemap is used and site based ligand docking is performed, from that the libraries of Purvalanol-A is docked interacted through molecular docking. The top scores of the new leads, which are better than known Purvalanol-A(-6.702560) are given, for knowledge of predicted active site interaction.

| Ligand Position             | Addition of atoms        | Docking score | H-Bonds | Active site                |
|-----------------------------|--------------------------|---------------|---------|----------------------------|
| Purvalanol-A<br>R1 Position | Fluorenylmethoxycarbonyl | -8.565992     | 2       | GLY34, LEU57               |
|                             | Danzyl                   | -8.366800     | 2       | ARG10                      |
|                             | Carboxyl                 | -8.148589     | 2       | ASP32, LEU57               |
|                             | Phospho                  | -8.079790     | 2       | GLY34, LEU57               |
|                             | Phosphato                | -8.077829     | 4       | GLY34, ASP36, LEU57        |
|                             | Acetoacetyl              | -8.073759     | 2       | ASP36, LEU57               |
|                             | Cyclopentadiene          | -7.982675     | 2       | ASP36, LEU57               |
|                             | Sulfoamino               | -7.916354     | 4       | ASP32, GLY34, ASP36, LEU57 |
|                             | Nitroso                  | -7.852271     | 3       | ASP32, GLY34               |
|                             | Formyloxy                | -7.690499     | 2       | ASP36, LEU57               |
|                             | Sulfamoyl                | -7.678700     | 3       | GLY34, ASP36, LEU57        |
|                             | Phosphito                | -7.455105     | 3       | ASP36, LEU57               |
|                             | Azido                    | -7.367854     | 2       | GLY34, LEU57               |
|                             | Tosyl                    | -7.314779     | 2       | ASP36, LEU57               |
|                             | Carbamoyl                | -7.305788     | 2       | LEU57, LEU30               |
|                             | Phenyloxycarbonyl        | -7.256961     | 3       | ARG10, MET37               |
|                             | Cyclopentane             | -7.219739     | 2       | GLY34, LEU57               |
|                             | Vinyl                    | -7.065922     | 2       | ASP36, LEU57               |
|                             | Benzyloxycarbonyl        | -7.029579     | 2       | ARG10, MET37               |
|                             | Sulfo                    | -6.999499     | 3       | GLY34, ASP36, LEU57        |
|                             | Trifluoromethyl          | -6.990306     | 1       | LEU57                      |
|                             | N-Pentyl                 | -6.987267     | 1       | GLY34                      |
|                             | Isothiocyanato           | -6.979956     | 2       | GLY34, LEU57               |
|                             | Trifluoroacetyl          | -6.979547     | 1       | GLY34                      |
|                             | Trichloromethyl          | -6.951050     | 2       | GLY34, ASP36               |
|                             | Sulfato                  | -6.910771     | 2       | ASP32, GLY34               |
|                             | Benzyl                   | -6.892773     | 2       | GLY34, LEU57               |
|                             | Allyl                    | -6.866976     | 1       | GLY34                      |
|                             | Isobutiryl               | -6.852768     | 2       | ASP36, LEU57               |

Table S1. Purvalanol-A attached library compounds at R1 position docking results with H-Bond interactions and active site involved in interaction are tabulated.

|                                     |                           |           |              |                            |
|-------------------------------------|---------------------------|-----------|--------------|----------------------------|
| <b>Purvalanol-A<br/>R2 Position</b> | Carboxyl                  | -9.093357 | 4            | GLY34, ASP36, MET37        |
|                                     | Phosphato                 | -8.711677 | 4            | ASP32, ASP36, LEU57        |
|                                     | Phosphito                 | -8.590773 | 3            | ASP32, ASP36, LEU57        |
|                                     | Acetoacetyl               | -8.399700 | 4            | ASP32, ASP36, MET37, LEU57 |
|                                     | Cyclopentadiene           | -8.179610 | 1            | GLY34                      |
|                                     | Benzoyl                   | -7.972852 | 1            | LEU57                      |
|                                     | Thiocyanato               | -7.916242 | 2            | GLY34, MET37               |
|                                     | Tosyl                     | -7.784949 | 3            | ASP32, GLY34, MET37        |
|                                     | Benzyl                    | -7.701221 | 2            | ASP32, LEU57               |
|                                     | Acetoxy                   | -7.696410 | 2            | MET37, LEU57               |
|                                     | Trifluoroacetyl           | -7.669722 | 2            | MET37, LEU57               |
|                                     | T-butyl                   | -7.585948 | 1            | GLY34                      |
|                                     | Danzyl                    | -7.522937 | 4            | GLY34, GLY58, ALA59        |
|                                     | Butyl                     | -7.489091 | 2            | ASP32, LEU57               |
|                                     | Isobutyl                  | -7.459519 | 1            | LEU57                      |
|                                     | Fluoroenylmethoxycarbonyl | -7.450053 | 3            | ASP36, ALA59               |
|                                     | Formamido                 | -7.393833 | 2            | GLY34, MET37               |
|                                     | Cyano                     | -7.350278 | 2            | ASP32, LEU57               |
|                                     | Ethynyl                   | -7.350278 | 2            | ASP32, LEU57               |
|                                     | Formyloxy                 | -7.343531 | 2            | MET37, LEU57               |
|                                     | Benzyloxycarbonyl         | -7.339480 | 4            | GLY34, LEU57, ALA59        |
|                                     | Sulfoamino                | -7.285997 | 1            | MET37                      |
|                                     | Chloroformyl              | -7.269403 | 2            | ASP32, LEU30               |
|                                     | N – Pentyl                | -7.248576 | 1            | GLY34                      |
|                                     | Benzene                   | -7.248576 | 2            | ASP32, GLY34               |
|                                     | Formyl                    | -7.177764 | 2            | MET37, LEU57               |
|                                     | Acetamido                 | -7.138717 | 1            | MET37                      |
|                                     | Trifyl                    | -6.986313 | 3            | ASP32, ASP36, LEU57        |
|                                     | Sulfato                   | -6.971282 | 2            | ASP36, MET37               |
|                                     | Acetyl                    | -6.952335 | 2            | ASP32, ASP36               |
|                                     | Cyanato                   | -6.945774 | 1            | GLY34                      |
|                                     | I-Amyl                    | -6.939794 | 2            | GLY34, LEU57               |
|                                     | Pivaloyl                  | -6.931592 | 2            | ASP32, GLY34               |
|                                     | Ethoxycarbonyl            | -6.931443 | 2            | ASP36, LEU57               |
| Tetrohydropyranal                   | -6.913617                 | 1         | GLY34        |                            |
| Sulfamoyl                           | -6.913538                 | 2         | ASP32, LEU57 |                            |
| Trityl                              | -6.837340                 | 2         | GLY34        |                            |
| Phenyloxycarbonyl                   | -6.809987                 | 2         | GLY34, ALA59 |                            |
| Cyclobutane                         | -6.803285                 | 1         | ASP32        |                            |

Table S2. Purvalanol-A attached library compounds at R2 position docking results with H-Bond

interactions and active site involved in interaction are tabulated.

|                                     |                     |            |   |                            |
|-------------------------------------|---------------------|------------|---|----------------------------|
| <b>Purvalanol-A<br/>R3 Position</b> | Phenyloxycarbonyl   | -10.208523 | 2 | GLY34, MET37               |
|                                     | Phosphato           | -10.028146 | 5 | ASP32, GLY34, ASP36        |
|                                     | Chloroformyl        | -9.967000  | 3 | ASP32, GLY34, MET37        |
|                                     | Cycloheptane        | -9.265767  | 1 | ASP36                      |
|                                     | Trifluoroacetyl     | -9.141660  | 4 | ASP32, GLY34, ASP36, MET37 |
|                                     | Phosphito           | -9.085907  | 2 | ASP36, LEU57               |
|                                     | Acetamido           | -9.036692  | 2 | ASP32, GLY34, ASP36, MET37 |
|                                     | Nitroxy             | -8.934191  | 3 | ASP32, GLY34, MET37        |
|                                     | Acetyl              | -8.867921  | 3 | ASP32, GLY34, ASP36        |
|                                     | Benzene             | -8.831860  | 1 | GLY34                      |
|                                     | T – Butyl           | -8.777912  | 2 | ASP32, GLY34               |
|                                     | Trichloromethyl     | -8.622579  | 2 | ASP32, GLY34               |
|                                     | Sulfino             | -8.548162  | 1 | MET37                      |
|                                     | Benzoyl             | -8.519988  | 1 | MET37                      |
|                                     | Sulfato             | -8.468488  | 2 | GLY34, MET37               |
|                                     | Formamido           | -8.308966  | 2 | GLY34, MET37               |
|                                     | Benzyl              | -8.303546  | 1 | ASP36                      |
|                                     | Formyl              | -8.228145  | 3 | ASP32, GLY34, MET37        |
|                                     | Chlorosulfonyl      | -8.218263  | 3 | ASP32, GLY34, ASP36        |
|                                     | Sulfoamino          | -8.214180  | 4 | ASP32, GLY34, LEU57        |
|                                     | T- Butyloxycarbonyl | -8.123968  | 1 | GLY34                      |
|                                     | Isobutiryl          | -7.854320  | 2 | ASP32, MET37               |
|                                     | Acetoacetyl         | -7.813852  | 3 | ASP32, GLY34, MET37        |
|                                     | Benzyloxycarbonyl   | -7.777628  | 2 | ASP32, MET37               |
|                                     | Thiocyanato         | -7.722379  | 2 | ASP32, GLY34               |
|                                     | Trifluoromethyl     | -7.335328  | 2 | ASP32, MET37               |
|                                     | Phosphano           | -7.330417  | 4 | GLY34, SER55, LEU57, GLN62 |
|                                     | Acetoxy             | -7.312448  | 3 | ASP32, GLY34, MET37        |
|                                     | S-Butyl             | -7.277311  | 1 | ASP32                      |
|                                     | Cyclooctane         | -7.258960  | 1 | ASP36                      |
|                                     | Formyloxy           | -7.135790  | 2 | ASP32, ASP36               |
|                                     | Cyano               | -7.097047  | 2 | ASP32, MET37               |
|                                     | Carboxyl            | -7.035752  | 2 | GLY34, MET37               |
|                                     | N – Propyl          | -6.986083  | 1 | GLY34                      |
|                                     | Tosyl               | -6.969499  | 2 | ASP36, MET37               |

Table S3. Purvalanol-A attached library compounds at R3 position docking results with H-Bond interactions and active site involved in interaction are tabulated.



|                                     |                          |           |   |                            |
|-------------------------------------|--------------------------|-----------|---|----------------------------|
| <b>Purvalanol-A<br/>R4 Position</b> | Formyl                   | -9.792020 | 4 | ASP32, ASP36, LEU57        |
|                                     | Carboxyl                 | -9.295359 | 5 | ASP32, ASP36, MET37, LEU57 |
|                                     | Fluroenylmethoxycarbonyl | -9.221705 | 4 | ASP32, ASP36, ALA59        |
|                                     | Benzyloxycarbonyl        | -9.017948 | 4 | ASP32, ASP36, ALA59        |
|                                     | Phenyloxycarbonyl        | -8.812543 | 4 | GLY34, LEU57, ALA59        |
|                                     | Phosphito                | -8.773525 | 4 | ASP36, MET37, LEU57        |
|                                     | Ethynyl                  | -8.645007 | 3 | ASP32, GLY34, LEU57        |
|                                     | Acetoacetyl              | -8.627168 | 2 | ASP36, LEU57               |
|                                     | Phosphato                | -8.520319 | 4 | GLY34, ASN97, ALA99        |
|                                     | Trityl                   | -8.129960 | 5 | ASP32, GLY34, LEU57        |
|                                     | Cycloheptane             | -8.075769 | 2 | ASP36, ALA59               |
|                                     | Propyl                   | -8.070831 | 3 | ASP32, GLY34               |
|                                     | Cyano                    | -7.983771 | 3 | ASP32, ASP36, LEU57        |
|                                     | Formyloxy                | -7.838598 | 2 | ASP32, MET37               |
|                                     | Phosphano                | -7.792247 | 3 | ASP32, GLY34, MET37        |
|                                     | Cyanato                  | -7.768998 | 3 | ASP32, LEU57               |
|                                     | Danzyl                   | -7.686912 | 1 | GLY34                      |
|                                     | Acetoxy                  | -7.674101 | 3 | ASP32, MET37               |
|                                     | Sulfino                  | -7.611824 | 3 | ASP32, ASP36, LEU57        |
|                                     | Sulfato                  | -7.574927 | 2 | ASN97, ALA99               |
|                                     | Thiocyanato              | -7.434632 | 2 | ASP32, LEU57               |
|                                     | Allyl                    | -7.430779 | 2 | GLY34                      |
|                                     | Cyclopropane             | -7.304613 | 2 | ASP32, GLY34               |
|                                     | Chloroformyl             | -7.242689 | 2 | GLY34, LEU57               |
|                                     | Cyclopentane             | -7.212437 | 1 | LEU57                      |
|                                     | Vinyl                    | -7.148030 | 2 | ASP32, GLY34               |
|                                     | Tosyl                    | -7.145920 | 2 | ALA59                      |
|                                     | T-Butyl                  | -7.077889 | 1 | ALA59                      |
|                                     | Benzyl                   | -6.989732 | 2 | ASP36, ALA59               |
|                                     | T- Butyloxycarbonyl      | -6.955697 | 3 | ASP36, ALA59               |
|                                     | N – Pentyl               | -6.953860 | 2 | ALA59                      |

Table S4. Purvalanol-A attached library compounds at R4 position docking results with H-Bond

interactions and active site involved in interaction are tabulated.
